# Supplementary material
Source: Springer Nature journal article supplement (https://www.springermedizin.de/resource/supplementary/12967_2010_660_MOESM10_ESM.pdf/9577230)

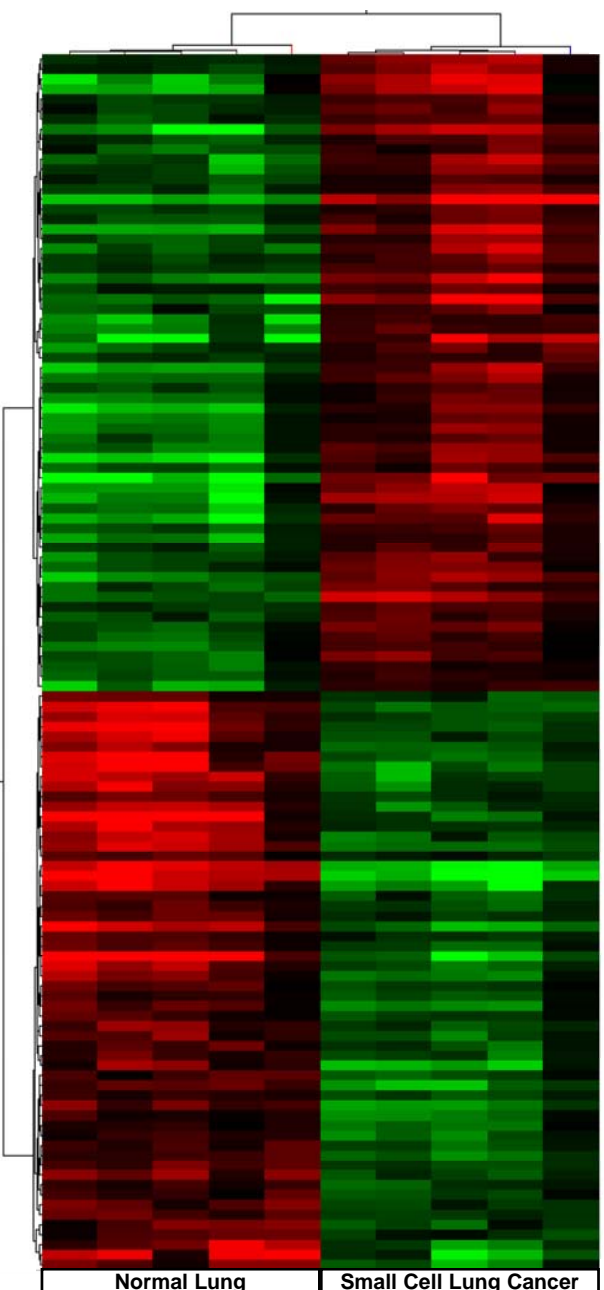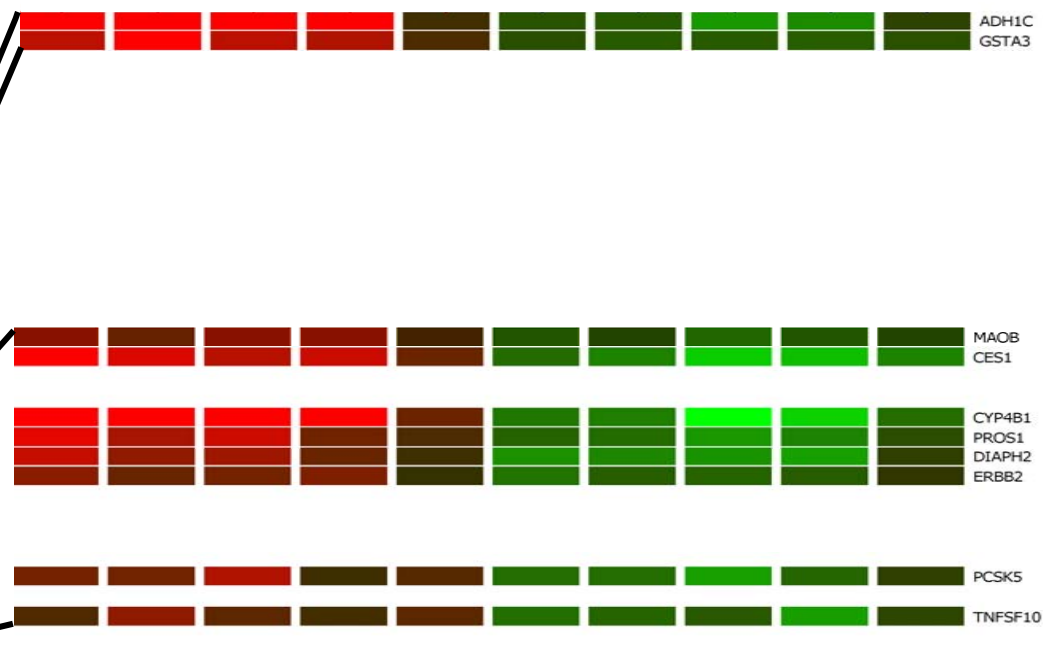

Normal Lung

Small Cell Lung Cancer

ADH1C  
GSTA3

MAOB  
CES1

CYP4B1  
PROS1  
DIAPH2  
ERBB2

PCSK5  
TNFSF10

Supplement: MOESM10 [file 9577230]
